# Supplementary material
Source: publisher figshare collection journal article supplement (https://brill.figshare.com/ndownloader/files/40302709)
Supplement: Supplementary file 1 [file 40302709]

# Seals Concerning the Sebettu/Pleiades

## Catalogue of Seals

### Cat. No. 1

Australian Institute of Archaeology in Melbourne

Merrillees 1990, No. 1

Black Serpentine; Neo-Assyrian, 7th c.; 43×16 mm

Description: Archer riding on chariot with two horses in harness leaping forward; Pleiades above.

### Cat. No. 2

Aleppo Museum, M. 694

Hammade 1987, No. 271

Hematite; Neo-Assyrian, 8th c.; 22×11 mm

Description: Winged man flanked by two gazelles; Pleiades in field above.

### Cat. No. 3

Aleppo Museum, M. 6013

Hammade 1987, No. 266

Steatite; Neo-Assyrian, 8th c.; 21×9 mm

Description: Large quadruped in field with Pleiades above; seven dots presented in unusual configuration.

### Cat. No. 4

Aleppo Museum, M. 6062

Hammade 1987, No. 272

Agate; Neo-Assyrian, 7th c.; 16×13 mm

Description: Bull-man setting an offering before the king; in field are crescent, star, and Pleiades.

### Cat. No. 5

Aleppo Museum, M. 6381

Hammade 1987, No. 265

Black Steatite; Neo-Assyrian, 8th c.; 22×11 mm

Description: Two human figures facing each other, potentially worshippers or a ritual scene. In field, spear of Marduk, sacred palm tree, and Pleiades.

## Cat. No. 6

Ashmolean Museum, 1939.545

Collon 1982, No. 109

Steatite; Site: Alalakh; Middle Assyrian, 14th c.; 22 × 10 mm

Description: Two male figures flanking staff with winged disc atop; third figure before a stylized tree; seven dots in loose arrangement, possibly Pleiades.

## Cat. No. 7

Berlin Antikensammlung, SA 206

Klengel-Brandt 1997, fig. 157

Chalcedony; Neo-Assyrian, 8th c.; 42 × 16 mm

Description: Worshipers facing each other with winged disc, crescent, and Pleiades above.

## Cat. No. 8

Bibliothèque Nationale, Delaporte No. 322

Delaporte 1910, No. 322

White Chalcedony; Neo-Assyrian, 8th c.; 28 × 13 mm

Description: Central warrior figure flanked by two rampant winged bull-men, grasping one of their forelegs in each hand. Small caprid between them. In field, lozenge, Pleiades.

## Cat. No. 9

Bibliothèque Nationale, Delaporte No. 323

Delaporte 1910, No. 323

White Chalcedony; Neo-Assyrian; 31 × 15 mm

Description: Seal quite worn. Central warrior figure flanked by two beasts: winged bull-man and griffin, each rampant with one foreleg seized by the warrior. Possible crescent above, Pleiades in vertical arrangement between the figures.

## Cat. No. 10

Bibliothèque Nationale, Delaporte No. 340

Delaporte 1910, No. 340

Cornaline; Neo-Assyrian; 24 × 12 mm

Description: Worshiper before altar with lozenge, fish, and crescent atop staff set upon it. Across from altar, reclining ibex. Pleiades and star above.

## Cat. No. 11

Bibliothèque Nationale, No. Delaporte 350

Delaporte 1910, No. 350

Neo-Assyrian; 24 × 12 mm

Description: Three worshippers (two on left, one on right) flanking altar with cup and other objects atop it and winged disc above. Many objects in field: star, crescent, and Pleiades above; lozenge, fish, bull's head, and staff below.

Cat. No. 12

Bibliothèque Nationale, No. Delaporte 353

Delaporte 1910, No. 353

Serpentine; Neo-Assyrian; 16 × 14 mm

Description: Worn or recut seal. Top half of three figures—possibly a seated deity and worshipper, with another deity with nimbus behind. Sun, crescent, and Pleiades above.

Cat. No. 13

Bibliothèque Nationale, Delaporte No. 354

Delaporte 1910, No. 354

Chalcedony; Neo-Assyrian; 55 × 18 mm

Description: God holding scepter standing atop resting animal. Worshiper and another deity approaching, facing to the left, with a small tree between the two. Winged disc with small deity within it above the two. In field, star and Pleiades.

Inscription: Worn: Seal of <sup>d</sup>Aššur-bel-ušur ... officer of the land of *Ia-a* ...

Cat. No. 14

Bibliothèque Nationale, Delaporte No. 355

Delaporte 1910, No. 355

White Chalcedony; Neo-Assyrian; 42 × 17 mm

Description: Deity atop griffin with worshipper approaching, another deity (on platform) at his back. Scorpion man stands third. In field, lozenge, star, crescent, Pleiades, and spade of Marduk.

Cat. No. 15

Bibliothèque Nationale, Delaporte No. 357

Delaporte 1910, No. 357

Rose Jasper; Neo-Assyrian; 35 × 16 mm

Description: Worshipper flanked by two deities, each with nimbus of stars. Tree before rightmost deity. In field, star, lozenge, fist, and Pleiades in 3-3-2 configuration.

Cat. No. 16

Bibliothèque Nationale, Delaporte No. 359

Delaporte 1910, No. 359

Agate; Neo-Assyrian; 21 × 11 mm

Description: Deity standing atop resting bull, worshipper before him and spade between them. Behind deity, staff and rampant winged bull-man. In field, crescent, Pleiades, and star.

Publication: Delaporte, *Cylindres Orientaux de la Bibliothèque Nationale*, No. 359

Cat. No. 17

Bibliothèque Nationale, Delaporte No. 378

Delaporte 1910, No. 378

Pale Rose Jasper; Neo-Assyrian; 22 × 10 mm

Description: Two rampant rams facing a sacred tree with Pleiades in 3-3 arrangement with the last globe centrally set beneath the two rows. Star behind each ram.

Cat. No. 18

Bibliothèque Nationale, Delaporte No. 548

Delaporte 1910, No. 548

Chalcedony; Neo-Assyrian; 14 × 13 × 8 mm

Description: Stamp seal with large star and the Pleiades.

Cat. No. 19

Bibliothèque Nationale, Delaporte No. 549

Delaporte 1910, No. 349

Agate; Neo-Assyrian; 28 × 18 × 11 mm

Description: Stamp seal with crescent, staff, star, and Pleiades.

Cat. No. 20

Bibliothèque Nationale, Delaporte No. 551

Delaporte 1910, No. 551

Chalcedony; Neo-Assyrian; 22 × 18 × 10 mm

Description: Stamp seal with worshipper before large crescent and the Pleiades, small staff or sword at his back.

Cat. No. 21

Bible Lands Museum Jerusalem, 424b

Collon 1993, Fig. 15

Chalcedony; Middle Assyrian

Description: Crescent, star, and Pleiades.

## Cat. No. 22

Bible Lands Museum Jerusalem, 487a

Collon 1993, Fig. 28

Chalcedony; Middle Assyrian

Description: Crescent moon, star, and Pleiades.

## Cat. No. 23

British Museum, 18249

Collon 2001, No. 257

Chalcedony; Neo-Assyrian, 9th c.; 14.5 × 33.5 mm

Description: Two bearded worshippers extending their left hands, right hands touch tassel hanging down from a canopy, under which are the spade of Marduk, resting atop a *mušhuššu*. Also, stylus of Nabû, fish, rhombus, star, and Pleiades. Small deity below Pleiades.

## Cat. No. 24

British Museum, 89113

Collon 2001, No. 290

Carnelian; Neo-Assyrian, late 8th c.; 26 × 11.5 mm

Description: Beardless worshipper wearing robe; approaching him another figure, with sword at waist, standing atop charging griffin-lion. In field, crescent, star, stylus of Nabû, Pleiades, two lozenges.

Inscription: NU <sup>4</sup>DIM. Meaning (and reading) uncertain, possibly owner of seal.

## Cat. No. 25

British Museum, 89139

Collon 2001, No. 256

Chalcedony; Neo-Assyrian; 42 × 16.5 mm

Description: Worshipper facing deity, probably a goddess, wearing a horned head-dress and bearing a sword and mace. Deity stands atop griffin, with Pleiades behind her.

Inscription: Seal of Bel-Mušallim: whosoever removes this seal, may Šamaš remove him.

## Cat. No. 26

British Museum, 89164

Collon 2001, No. 252

Chalcedony; Neo-Assyrian; 40 × 19 mm

Description: Goddess with horned headdress and sword at waist next to sigil of Marduk. Another similar deity on opposite dais with worshipper facing pair. Pleiades, crescent moon, and winged sun disc overhead. Parallel to seal of Shalmaneser IV.

Inscription: Seal of Tariba-Ištar. Whoever wears this, may he keep in good health.

## Cat. No. 27

British Museum, 89331

Collon 2001, No. 215

Blue Chalcedony; Neo-Assyrian; 40×18.5 mm

Description: Cow suckling calf beneath winged disc, looking back at leaping gazelle.

Behind them, figure astride a leaping horse and a standing worshipper. In field, winged disc, star, crescent, staff, spade, and Pleiades.

## Cat. No. 28

British Museum, 89334

Collon 2001, No. 279

Blue Chalcedony; Neo-Assyrian, early 7th c.; 39.5×17 mm

Description: Worshipper facing deity atop reclining animal; another, similar deity at his back. In field, lozenge, caprid, star, crescent, and Pleiades.

## Cat. No. 29

British Museum, 89339

Collon 2001, No. 250

Grey-Brown Chalcedony; Neo-Assyrian, early 7th c.; 21.5×11.5 mm

Description: Bearded worshipper before goddess bearing mace; another deity behind her. In field, Pleiades, spade of Marduk, crescent, rhombus, and star.

## Cat. No. 30

British Museum, 89351

Collon 2001, No. 245

Grey-Brown Chalcedony; Neo-Assyrian; 43×16 mm

Description: Beardless worshipper before deity, another deity behind, with rays behind him. In field, tasseled spade of Marduk, crescent, star, and Pleiades.

## Cat. No. 31

British Museum, 89380

Collon 2001, No. 137

Chalcedony; Neo-Assyrian; 38×18.5 mm

Description: Worshipper stands facing a seated bearded god, who wears a horned head-dress. Between them is a low table with an offering. Behind the deity stands another figure, winged. In field, crescent, rhombus, and Pleiades.

## Cat. No. 32

British Museum, 89382

Collon 2001, No. 156

Grey-Brown Chalcedony; Neo-Assyrian 7th c.; 26.5×13 mm

Description: Worshipper at left before incense burner; winged and nude goddess before tree; Pleiades, crescent moon, and star overhead.

Cat. No. 33

British Museum, 89403

Collon 2001, No. 17

Hematite; Middle Assyrian, Late 10th c.; 53×21 mm

Description: Winged bull paces towards a tree, behind it is a kneeling archer. Above is a god in a winged disc between two human-headed goat-fish. In field, crescent, Pleiades, fish, and star.

Cat. No. 34

British Museum, 89406

Collon 2001, No. 244

Rock Crystal; Neo-Assyrian; 25×12 mm

Description: Bearded worshipper before goddess with a sword at her waist. Another, similar deity figure alongside. In field, rhombus, goat, and stylus of Nabû, Pleiades.

Cat. No. 35

British Museum, 89443

Collon 2001, No. 151

Dark red Soapstone; Neo-Assyrian; 36.5×13.5 mm

Findspot: Sherif Khan

Description: Linear style with a winged disc above a tree, flanked by figures, each with a raised hand. In field, Pleiades and chevron border. Tin-bronze pin preserved in seal (total height 46 mm).

Cat. No. 36

British Museum, 89470

Collon 2001, No. 147

Agate; Neo-Babylonian; 30×12 mm

Description: Priest with knife before altar with a fish resting atop it; axe and double mace; star, crescent moon, and Pleiades overhead.

Cat. No. 37

British Museum, 89478

Collon 2001, No. 219

Carnelian; Neo-Assyrian; 22.5×10 mm

Description: Two worshippers with raised hands, cow suckling a calf. In field, Pleiades in vertical arrangement, crescent moon, and star.

## Cat. No. 38

British Museum, 89571

Collon 2001, No. 213

Grey-Blue Chalcedony; Neo-Assyrian; 44 × 19.5 mm

Description: Bull-man facing deity with staff between them; rampant bull with backwards-facing neck. In field, crescent, fish, star, and Pleiades in vertical arrangement.

## Cat. No. 39

British Museum, 89575

Collon 2001, No. 200

Grey-Blue Chalcedony; Neo-Assyrian, 8th/7th c.; 37.5 × 15 mm

Description: Man with raised hands facing winged bull. Winged disc above worshipper, crescent, star, and Pleiades above.

## Cat. No. 40

British Museum, 89584

Collon 2001, No. 129

Serpentine; Neo-Assyrian, 8th–7th c.; 35.5 × 12 mm

Findspot: Kalḫu (N 1083)

Description: Attendant wearing a robe stands facing a seated deity, raising one hand with ring in another. Worn caprid behind seated deity. Pleiades in vertical arrangement.

## Cat. No. 41

British Museum, 89590

Collon 2001, No. 213

Jasper; Neo-Assyrian; 44 × 19.5 mm

Description: Worshipper before seated, bearded figure. An attendant with a fan stands behind the seated figure. A table is between the worshipper and seated figure. In field, star, spade, crescent, Pleiades in vertical arrangement, two small deities.

## Cat. No. 42

British Museum, 89595

Collon 2001, No. 321

Quartz; Neo-Assyrian, 8th c.; 31 × 12 mm

Findspot: Kalḫu (N 1096)

Description: Warrior holding a horned animal by the leg with his left hand a bow held in his right hand. In field, winged disc, crescent, Pleiades in vertical arrangement.



## Cat. No. 43

British Museum, 89597

Collon 2001, No. 136

Chalcedony; Neo-Assyrian, early 7th c.; 26 × 12 mm

Findspot: Kalḫu, South-East Palace

Description: Bearded worshipper striding towards a deity. The chair is high-backed and ornamented with five drill-holes. In the field, the Pleiades, winged disc, spade of Marduk, crescent, star, rhombus.

## Cat. No. 44

British Museum, 89600

Collon 2001, No. 67

Green and Black Serpentine; Middle Assyrian, late 10th c.; 40 × 15 mm

Description: Bearded sphinx attacks wild goat with a plant in front of it. In the field, the Pleiades, crescent, and an incomplete rhombus. Chevron borders at top and bottom of seal.

## Cat. No. 45

British Museum, 89602

Collon 2001, No. 242

Carnelian; Neo-Assyrian; 17 × 8.5 mm

Findspot: Kalḫu, South-East Palace (N 1087)

Description: Winged and beardless figure wearing a tall, feather-topped headdress. Facing the figure is a bearded worshipper. Pleiades between the two.

## Cat. No. 46

British Museum, 89608

Collon 2001, No. 70

Serpentine; Neo-Assyrian; 23.8 × 11.5 mm

Findspot: Kalḫu, South-East Palace (N 1108)

Description: Two winged human-headed bird hybrids (griffins), one with scorpion's tail, stride to the left. Above them is a star and between them the Pleiades.

## Cat. No. 47

British Museum, 89617

Collon 2001, No. 225

Limestone; Neo-Assyrian; 29 × 12.5 mm

Findspot: Kalḫu (N 1118)

Description: Linear style seal: spade of Marduk atop a scorpion-tailed *mušhuššu*. A bearded god and seven or eight globes in standard Pleiades arrangement.

Cat. No. 48

British Museum, 89619

Collon 2001, No. 133

Serpentine; Neo-Assyrian; 33 × 15 mm

Description: Bearded worshipper (possibly the king) wearing a robe and facing a deity seated on a chair adorned with stars. Between them rests a tall incense burner, above which are a crescent and the Pleiades.

Cat. No. 49

British Museum, 89620

Collon 2001, No. 214

Serpentine; Neo-Assyrian; 25 × 11.5 mm

Findspot: Kalḫu (N 1120)

Description: Linear style seal. Bearded figure in fringed robe reaching towards cow that suckles her calf while being mounted by a bull. In the field, crescent, seven-rayed star, and the Pleiades.

Cat. No. 50

British Museum, 89640

British Museum Online Catalogue

Chalcedony; Late Mitannian; 21 × 11 mm

Findspot: Kalḫu, South-East Palace (N 1142)

Description: Figure to the left carries an animal with a goat before them; Pleiades, scorpion.

Cat. No. 51

British Museum, 89656

Collon 2001, No. 121

Serpentine; Neo-Assyrian; 39 × 14 mm

Findspot: Kalḫu, South-East Palace (N 1213)

Description: An attendant wearing fringed robe grasping a bird by the neck, standing facing similar figure seated on a stool with bull's feet. Between the figures a cauldron on ring-stand, above are the Pleiades and crescent.

Cat. No. 52

British Museum, 89730

Collon 2001, No. 261

Serpentine; Neo-Assyrian; 16 × 8 mm

Find spot: Nineveh

Description: Wedges or stylus of Nabû and tasseled spade of Marduk, both atop box-stand. Bearded worshipper turned to the right; the other faces left. Pleiades rest above a fish.

Cat. No. 53

British Museum, 89731

Collon 2001, No. 24

Serpentine; 1500–1000 BC; 27.5 × 10 mm

Description: Quadruped resembling a horse or a bull rears up towards an archer, aiming an arrow at it. On either side of animal's head are a star and inverted crescent. Before it are the Pleiades.

Cat. No. 54

British Museum, 89763

Collon 2001, No. 338

Carnelian; Neo-Assyrian, 8th c.; 28 × 13 mm

Description: Enkidu and Gilgamesh subduing Humbaba; worshipper to the side. Spade and stylus of Nabû between him and combat scene. Pleiades above, seal bordered by two lines, top and bottom.

Inscription: (Seal) of Ninurta-ahu-usur

Cat. No. 55

British Museum, 89770

Collon 2001, No. 149

Chalcedony; Neo-Assyrian; 29.5 × 14 mm

Findspot: Babylon

Description: Syrian influenced-seal. Two figures sit atop stools facing each other with a table between them. They drink from shallow cups, one attended to by servant with fan. In field, winged disc, star, crescent, lozenge, and Pleiades.

Cat. No. 56

British Museum, 89775

Collon 2001, No. 95

Serpentine; Neo-Assyrian; 24.5 × 13.5 mm

Description: Seal half preserved, depicts possible chariot hunt. Small bull beside larger bull, head of horse (of chariot?) preserved. Pleiades, four of the seven preserved.

Cat. No. 57

British Museum, 89861

Collon 2001, No. 223

Chalcedony; Neo-Assyrian, 8th–7th c.; 22 × 18.5 mm

Description: Palm tree flanked by astral symbols and two worshippers. In field, crescent, star, and Pleiades. Seal bordered by lines.

Cat. No. 58

British Museum, 95476

Collon 2001, No. 248

Chalcedony; Late Babylonian; 25 × 13 mm

Description: Goddess wearing headdress with star atop it, armed with sword at her waist, bow at her back. On another dais, facing, rests a bearded god. Worshipper faces the deities. In field, spade of Marduk, Pleiades.

Cat. No. 59

British Museum, 99406

Collon 2001, No. 342

Pale green serpentine

Neo-Assyrian, 8th–6th c.; 40 × 14.5 mm

Description: Warrior facing left between two rampant griffins, reaching towards throat of one, holding staff against another. In field, Pleiades, rhombus, wedge, and large fish.

Cat. No. 60

British Museum, 102495

Collon 2001, No. 203

Chalcedony; Neo-Assyrian; 31.5 × 15.5 mm

Description: Winged, bearded and kneeling genie, flanked by fish-cloaked figure and two robed male figures. Winged disc, incense burner, tasseled spade, stylus, and Pleiades in field.

Cat. No. 61

British Museum, 103239

Collon 2001, No. 168

Carnelian; Neo-Assyrian, 7th c.; 33 × 13.5 mm

Description: Tree flanked by worshippers, rhombus, fish; disc, crescent moon, and Pleiades overhead.

Cat. No. 62

British Museum, 104499

Collon 2001, No. 174

Chalcedony; Neo-Assyrian, late 8th c.; 26 × 13 mm

Description: Tree flanked by two worshippers, one wearing a fish-robe. Dog crouches to the right of worshippers. In field, winged disc with deity within, crescent, rosette, and then Pleiades.

Cat. No. 63

British Museum, 116142

Collon 2001, No. 286

Serpentine; Neo-Hittite (found in Late Hittite context); 17.5×13.5 mm

Findspot: Karkemiš

Description: Horned reptile, part of head visible and facing crescent. Behind it bearded god and four of the Pleiades. Chevron border.

Cat. No. 64

British Museum, 119426

Collon 2001, No. 232

Chalcedony; Neo-Assyrian; 34.5×15 mm

Description: Bearded god aiming arrow at rampant lion-griffin. Deity seated on throne with crouching dog underfoot. In field, crescent, stars, Pleiades, and two lines bordering seal.

Cat. No. 65

British Museum, 123349

Collon 2001, No. 97

Serpentine; Neo-Assyrian; 31.5×14 mm

Findspot: Karkemiš

Description: Only upper part of seal survives; horse drawing chariot. In field, rhombus, winged disc, and Pleiades.

Cat. No. 66

British Museum, 126064

Collon 2001, No. 204

Chalcedony; Neo-Assyrian, early 8th c.; 37×17 mm

Findspot: Al Mina (MNN. 1)

Description: Complicated seal. Presentation scene, worshipper with a kid and protective lamma figure. Central deity a large figure with raised arms from which rivers flow that end in pomegranates. His arms flank winged disc of Aššur. Small scene details goddess in architectural feature flanked by winged genii. In field are ankh, bull head, Pleiades, two small astral deities surrounded by rosette and nimbus of lines, respectively. Also in field are the spade of Marduk and stylus of Nabû.

Cat. No. 67

British Museum, 129538

Collon 2001, No. 234

Carnelian; Neo-Assyrian; 22.5 × 14 mm

Description: Goddess Gula seated on chair set atop dog with worshipper facing her.

Spade of Marduk and stylus of Nabû between worshipper and lion-cloaked figure.

In field, four stars, crescent, winged disc and Pleiades.

Cat. No. 68

British Museum, 129544

Collon 2001, No. 206

Chalcedony; Neo-Assyrian; 39 × 16.5 mm

Description: Two figures flanking architectural element with figure crouching within.

In field, winged disc, star, Pleiades, bird, and three lozenges.

Cat. No. 69

British Museum, 130699

Collon 2001, No. 157

Chalcedony; Neo-Assyrian; 39 × 16.5 mm

Description: Two figures flanking tree, one wearing fish cape. Behind him, plant, reclining caprid with spade and stylus atop its back. In field, large rosette, crescent, winged disc with figures within, and Pleiades.

Cat. No. 70

British Museum, 134640

Collon 2001, No. 125

Serpentine; Neo-Assyrian; 22 × 20 mm

Description: Worshipper before seated figure with altar between them. Figure wearing fish-cape behind worshipper. In field, Pleiades and star.

Cat. No. 71

British Museum, 134768

Collon 2001, No. 27

Serpentine; Neo-Assyrian; 39.5 × 12 mm

Description: Archer attacking rampant winged-bull man. Crescent, star and Pleiades above.

Cat. No. 72

British Museum, 134836

Collon 2001, No. 20

Serpentine; Neo-Assyrian, 10th–8th c.; 43×16 mm

Description: Archer knelling and attacking charging bull. In the field, crescent, winged disc, bird, star, and Pleiades.

Cat. No. 73

British Museum, 140396

Collon 2001, No. 126

Serpentine; Neo-Assyrian; 35.5×15 mm

Findspot: N 1135

Description: Seal very worn. Worshipper flanking tree; crescent moon and six dots of the Pleiades in a vertical arrangement.

Cat. No. 74

British Museum, 140794

Collon 2001, No. 280

Jasper; Neo-Assyrian; 33×16.5 mm

Description: Worshipper with monstrous creature, likely a *mušhuššu* with the spade of Marduk and stylus of Nabû resting on its back. In field, a crescent, star, fish, rhombus, and the Pleiades.

Cat. No. 75

British Museum, 140849

Collon 2001, No. 134

Leaded tin-bronze; 9th–7th c.; 34×16.5×6.5 mm

Description: Stamp seal. Bearded figure in a fringed robe. Winged disc above couchant gazelle and star, Pleiades set alongside.

Cat. No. 76

British Museum, 141742

Collon 2001, No. 186

Serpentine; Neo-Assyrian; 20×11.5 mm

Findspot: Kalḫu, Burnt Palace, Rm. 23 (ND 3211)

Description: Linear style. Two wild goats leaping towards each other. In field with crescent, wedge, and Pleiades.

Cat. No. 77

Chiha Collection, 152

Doumet 1992, No. 152

Chalcedony; Neo-Assyrian, 9th c.; 26×irregular diameter, varies between 13 and 15 mm

Description: Two figures on chariot; one an archer attacking bull in mimicry of hunt-

ing scene. Border of curving lines mimicking guilloche pattern on top and bottom. Crescent, star, and Pleiades above.

Cat. No. 78

Chiha Collection, 155

Doumet 1992, No. 155

Red Agate; Neo-Babylonian, 6th c.; 36 × 15 mm

Description: Highly abstract linear style, two figures flanking sacred tree. Star and Pleiades to left.

Cat. No. 79

Chiha Collection, 297

Doumet 1992, No. 297

Faience; 14th c.; 17 × 7 mm

Description: Late Mitanni style seal with horned goat before plant; number of fish in background. Star, crescent, and Pleiades with lozenge in center of arrangement above.

Cat. No. 80

Damascus, No. 141

Kühne 1980

Brown-gold Agate; Neo-Assyrian; 26 × 12 mm

Findspot: Syria

Description: Worshippers flanking sacred tree with winged disc above. Fish and ibex set below star and Pleiades in vertical arrangement.

Cat. No. 81

Damascus, No. 1557

Kühne 1980

Steatite; Neo-Assyrian; 26 × 12 mm

Findspot: Syria

Description: Caprid crouching between plants with archer on other side; star and Pleiades above.

Cat. No. 82

Danish National Museum, No. 3433

Ravn 1960, No. 171

Alabaster; Middle Assyrian c. 1250; 56 × 32 mm

Description: Sealing: Striding winged bull and bull; human figure carrying worn and unidentifiable object. Crescent, star, and Pleiades above



## Cat. No. 83

Danish National Museum, No. 8607

Ravn 1960, No. 154

Alabaster; Neo-Assyrian c. 750; 31 × 15 mm

Description: Central figure with lifted arms, each seizing the neck of a bird. Birds are held aloft, heads turned backwards away from figure. In field, crescent, two lozenges, and Pleiades.

## Cat. No. 84

Danish National Museum, No. 5B 311

Ravn 1960, No. 107

Steatite; Hurrian, 3rd Syrian group (Hama F), 1200–1075 BC; 21 × 8 mm

Findspot: Riis, Hama

Description: Linear style seal. Man attacking striding animal; globes scattered, uncertain Pleiades.

## Cat. No. 85

Geneva, No. 1385

Vollenweider 1967, No. 70

Chalcedony; Neo-Assyrian; 25 × 10.5 mm

Description: Archer attacking two winged creatures: griffin and winged human-headed bull, in combat with each other. Star, crescent moon, and Pleiades above

## Cat. No. 86

Geneva, No. 1874/0.1

Vollenweider 1967, No. 75

Chalcedony; Late First Millennium; 40.5 × 19 mm

Findspot: Persepolis

Description: Two deities atop pedestals flanking two worshippers; one standing, one kneeling. *Mušhuššu*-dragon atop pedestal with spade of Marduk atop its back. In field, winged disc, crescent, stars, caprid, and Pleiades.

## Cat. No. 87

Geneva, No. 1881/0.18

Vollenweider 1967, No. 67

Dark Green Stone (unidentified); Neo-Assyrian; 35 × 13 mm

Findspot: Nineveh

Description: Worn seal. Worshipper before winged figure. Crescent moon and Pleiades in vertical arrangement.

## Cat. No. 88

Geneva, No. 1881/0.19

Vollenweider 1967, No. 76

Grey Stone (unidentified); Neo-Assyrian; 15 × 8 mm

Findspot: Nineveh

Description: Two worshippers flanking star, crescent, and lozenge. In field also fish symbol and Pleiades in vertical arrangement.

## Cat. No. 89

Hans von Aulock, No. 182

von der Osten, 1957, No. 182

Red Chalcedony; Neo-Assyrian; 16.5 × 11.5 × 8 mm

Description: Stamp seal with crescent moon and Pleiades in vertical arrangement opposite staff.

## Cat. No. 90

Hans von Aulock, No. 323

von der Osten, 1957, No. 323

Unidentified stone; Neo-Assyrian; 48.5 × 18 mm

Description: Man with beast and ostrich-bird; crescent moon, star, and Pleiades above.

## Cat. No. 91

Hans von Aulock, No. 324

von der Osten, 1957, No. 324

Red Chalcedony; Neo-Assyrian; 28. × 14 mm

Description: Two worshippers before sacred tree; spade and staff; star, crescent moon, Pleiades above.

## Cat. No. 92

Hans von Aulock, 328

von der Osten, 1957, No. 328

Milky White Chalcedony; Neo-Assyrian; 11 × 8.5 mm

Description: Simple seal, no central figures. Field marked with hatch marks with uncertain Pleiades.

## Cat. No. 93

Hans von Aulock, 331

von der Osten, 1957, No. 331

Hematite; Neo-Assyrian; 11 × 8.5 mm

Findspot: Aleppo

Description: Possible pastoral scene: animal in field, with star and Pleiades above.

Cat. No. 94

Haye, M. 60

Menant 1878, No. 143

Green Serpentine; Old Assyrian; 24.5 × 12 mm

Findspot: Elam

Description: Possible presentation or offering scene in linear Elamite style; seated deity in robe set before alter with attendant with Pleiades above. Smaller figure approaches before unidentified element.

Cat. No. 95

Los Angeles Museum of Art, M. 76.174.414

Moorey 1981, No. 1223

Yellow Chalcedony; Old Assyrian; 29 × 12 mm

Description: Archer astride animal attacking fleeing beast; spade and staff to far left. Winged figure to the right of archer. Single star and Pleiades above.

Cat. No. 96

Musée du Louvre, AM 457

Delaporte 1920, No. 924

Hematite; Neo-Assyrian; 24 × 11 mm

Description: Two worshippers flanking figure. Three registers to their right: reclining sphinx (to) border, three figures all facing left. In field, Pleiades and crescent.

Cat. No. 97

Musée du Louvre, AO 1161

Delaporte 1920, No. 680

Chalcedony; Neo-Assyrian; 30 × 14 mm

Description: Deity with nimbus of rays behind him, facing right. Worshipper before him, facing another deity atop horned animal. In field, crescent, star, Pleiades.

Cat. No. 98

Musée du Louvre, AO 1162

Delaporte 1920, No. 645

White Jasper; Neo-Assyrian; 24 × 12 mm

Description: Archer attacking winged, horned animal; rampant and looking backwards to archer. In field, fish symbol; winged disc, star, Pleiades in vertical configuration.

## Cat. No. 99

Musée du Louvre, AO 1510

Delaporte 1920, No. 681

Brown Chalcedony; Neo-Assyrian (?); 42 × 18 mm

Description: Two gods, one farthest to left with nimbus, other with emanating rays, bearded and with headdress. Both atop winged griffin-creatures. Worshipper facing both deities. In field, star, winged disc, Pleiades.

## Cat. No. 100

Musée du Louvre, AO 1511

Delaporte 1920, No. 651

Red Jasper; Neo-Assyrian (?); 41 × 16 mm

Description: Archer attacked griffin-monster in field of hatch-marks to suggest foliage. In field, star, crescent moon, winged disc, and Pleiades.

## Cat. No. 101

Musée du Louvre, AO 1520

Delaporte 1920, No. 691

Green Serpentine; Neo-Assyrian; 20 × 11 mm

Description: Simple linear style seal. Central star or rosette with two creatures flanking it, possibly a bird but identification is uncertain. Seven dots in vertical arrangement, possibly Pleiades.

## Cat. No. 102

Musée du Louvre, AO 1567

Delaporte 1920, No. 372

White Jasper; Neo-Assyrian; 26 × 12 mm

Description: Worshipper before two deities, each holding a scepter in their left hand. Before worshipper a small figure, waist-height.

Inscription: Manum, son of Paridum, servant of the god Amurru.

## Cat. No. 103

Musée du Louvre, AO 1908

Delaporte 1920, No. 669

Cornaline Rose; Neo-Assyrian; 31 × 14 mm

Description: Two worshippers flanking sacred tree with winged disc above. Small altar to the back of the worshippers. In field, star, crescent, and Pleiades.

## Cat. No. 104

Musée du Louvre, AO 2393

Delaporte 1920, No. 302

Hematite; Neo-Assyrian; 23 × 12 mm

Description: Two worshippers before deity. Small figure, waist-height, between the two worshippers. In field, crescent, dots of possible Pleiades (only five visible).

Inscription: <sup>d</sup>Adad, <sup>d</sup>Šala

## Cat. No. 105

Musée du Louvre, MN 130

Delaporte 1920, No. 688

Serpentine; Neo-Assyrian; 36 × 13 mm

Findspot: Kalḫu (N 8379)

Description: Seated deity with worshipper approaching. High altar between the two figures, with bird atop it. Linear style. Seven dots of Pleiades in irregular arrangement.

## Cat. No. 106

Musée du Louvre, MN 132

Delaporte 1920, No. 654

Brown Limestone; Neo-Assyrian; 24 × 8 mm

Findspot: Kalḫu (N 8395)

Description: Winged genii figure flanked by two creatures—bull-man and singe-horned equid. In field, star, crescent moon, seven globes in possible Pleiades above (arrangement typical but only five are visible).

## Cat. No. 107

Musée du Louvre, MNB 1199

Delaporte 1920, No. 687

Chalcedony; Neo-Assyrian; 27 × 14 mm

Description: Two bird-men figures flanked central deity, who wears a headdress. Seal obscured by damage: in the field, fish, lozenge, and Pleiades.

## Cat. No. 108

Musée du Louvre, MNB 1910

Delaporte 1920, No. 664

Brown Chalcedony; Neo-Assyrian; 34 × 16 mm

Description: Man kneels between two winged sphinx-figures that flank him. In the field, star, lozenge, and Pleiades.

Cat. No. 109

Musée du Louvre, AO 7217

Delaporte 1920, No. 686

White Chalcedony; Neo-Assyrian; 41×18 mm

Description: Two gods standing on beasts, each holding ring in their left hands. Worshipper set between them, facing right. In field, spade of Marduk, tall staff, winged disc, star, crescent, Pleiades.

Cat. No. 110

Marcopoli Collection, No. 131

Teissier 1984, No. 131

Hematite; c. 1750–1600 BC; 20×8 mm

Description: Seal worn. Four figures, possibly two pairs of worshipper and deity. One holds a staff with seven globes, another seven globes in sky as possible Pleiades.

Cat. No. 111

Marcopoli Collection, No. 164

Teissier 1984, No. 164

Composite stone; Neo-Assyrian, 10th–8th c.; 33×12 mm

Description: Standing archer attacking winged, horned beast standing in a thicket. In field, crescent, Pleiades, and fish.

Cat. No. 112

Marcopoli Collection, No. 186

Teissier 1984, No. 18

Marble; Neo-Assyrian, 10th–8th c.; 15×8.5 mm

Description: Chimera-monster with body of bird and tail of scorpion striding left, towards crouching caprid. In field, crescent and Pleiades.

Cat. No. 113

Marcopoli Collection, No. 209

Teissier 1984, No. 209

Serpentine; Neo-Assyrian, 10th–8th c.; 25×9.5 mm

Description: Animal orchestra: seated horse drinks through tube with an altar before it. On the other side, are a second horse (with possible clappers) and dog, playing a harp. In field, crescent, lozenge, rosette, and Pleiades.

Cat. No. 114

Marcopoli Collection, No. 215

Teissier 1984, No. 215

Serpentine; Neo-Assyrian, 10th–8th c.; 34 × 10 mm

Description: Two worshippers before a deity with ax at his belt, striding forward. In field, spade of Marduk, staff, crescent, rosette, and Pleiades.

Cat. No. 115

Marcopoli Collection, No. 216

Teissier 1984, No. 216

Serpentine; Neo-Assyrian, 8th c.; 35 × 13 mm

Description: Seal is worn. Two worshippers stand before winged figure, with short staff between them. In field, star, Pleiades, and crescent. Emanating rays behind deity.

Cat. No. 116

Marcopoli Collection, No. 218

Teissier 1984, No. 218

Serpentine; Neo-Assyrian, 10th–8th c.; 15 × 21 mm

Description: Seal only half-preserved (lower half missing). Worshipper with ring in right hand approaches seated deity, with stars lining his chair. In field, bird, crescent, rosette, and Pleiades.

Cat. No. 117

Marcopoli Collection, No. 222

Teissier 1984, No. 222

Serpentine; Neo-Assyrian, 10th–8th c.; 28 × 10 mm

Description: Worshipper seated on stool resting atop animal, another worshipper facing him, with small figure before him. In field, fish, lozenge, star, crescent, and Pleiades.

Cat. No. 118

Marcopoli Collection, No. 236

Teissier 1984, No. 236

Marble; Neo-Assyrian, 8th c.; 35 × 15 mm

Description: Deity astride standing animal before offering table with worshipper opposite, another deity atop animal behind worshipper. In field, crescent, star, spade, bull's head, and Pleiades. Inscription in Aramaic.

Inscription: Seal of El-Amar

Cat. No. 119

Marcopoli Collection, No. 237

Teissier 1984, No. 237

Carnelian; Neo-Assyrian, 8th c.; 19 × 11 mm

Description: Worshipper before a deity in a nimbus standing opposite each other, with an offering table between them. In field, staff and spade atop animal, lozenge, crescent, and Pleiades.

Cat. No. 120

Marcopoli Collection, No. 240

Teissier 1984, No. 240

Chert; Neo-Assyrian, 8th c.; 27 × 13 mm

Description: Two figures flanking sacred tree with winged disc atop it. One is a human worshipper and the other a scorpion-man. In field, crescent, star, and Pleiades.

Cat. No. 121

Marcopoli Collection, No. 241

Teissier 1984, No. 241

Carnelian; Neo-Assyrian (c. 800–700 BC); 20 × 8 mm

Description: Two worshippers flanking a sacred tree with winged disc atop. In field, star, crescent, and Pleiades in vertical arrangement.

Cat. No. 122

Marcopoli Collection, No. 243

Teissier 1984, No. 243

Chalcedony; Neo-Assyrian (c. 800–700 BC); 18 × 8.5 mm

Description: Two worshippers flanking a sacred tree with winged disc atop. In field, lozenge, crescent, and the Pleiades.

Cat. No. 123

Marcopoli Collection, No. 251

Teissier 1984, No. 251

Chalcedony; Neo-Assyrian, 7th c.; 21 × 10 mm

Description: Worshipper before winged disc atop staff with rays. In field, tasseled staff with crescent atop it, lozenge, and Pleiades in vertical arrangement.

Cat. No. 124

Marcopoli Collection, No. 252

Teissier 1984, No. 252

Chalcedony; Neo-Assyrian, 7th c.; 19 × 10 mm

Description: Worshipper before pole with crescent atop, Pleiades in vertical arrangement. In field, winged disc, fish, and lozenge.



Cat. No. 125

Marcopoli Collection, No. 416

Teissier 1984, No. 416

Hematite; 1920–1840 BC; 18 × 9 mm

Description: Seated figure before an altar, another figure opposite. On altar are two monkeys, and a reclining caprid above them. In field, Pleiades in vertical arrangement.

Cat. No. 126

Marcopoli Collection, No. 594

Teissier 1984, No. 594

Chert; 1450–1300 BC; 14 × 8 mm

Description: Seated figure drinking, with table before him. In field, reclining caprid, tree, possibly Pleiades in unusual arrangement.

Cat. No. 127

Marcopoli Collection, No. 633

Teissier 1984, No. 633

Hematite; 1450–1300 BC; 18 × 9 mm

Description: Animal in central field with unidentified animal pursuing it, Pleiades arrangement of dots below.

Cat. No. 128

Metropolitan Museum of Art, 1970.183.2

Image in MMA Online Catalogue

Glass, Egyptian Blue; Neo-Assyrian, 9th–8th c.; 25 × 13 mm

Description: Complex hunting scene; two figures on a chariot, one shooting a rampant unicorn/gazelle, the other driving the chariot. Above, star, crescent moon, and Pleiades.

Cat. No. 129

Metropolitan Museum of Art, 1985.192.15

Pittmann and Aruz 1987, No. 64

Agate; Neo-Assyrian, 9th–8th c.; 35 × 15 mm

Description: Deity with halo behind; two gods with worshipper facing with hand upraised. A large disembodied hand is below a single star and a crescent is set on a tasseled staff on a stand. Pleiades and star above.

## Cat. No. 130

Metropolitan Museum of Art, 1985.192.7

Pittmann and Aruz 1987, No. 65

Carnelian; Neo-Assyrian, 8th–7th c.; 29×14 mm

Description: Ištar with weapons and nimbus behind stands before a worshipper. Another deity, male, stands atop a platform underneath an architectural element. In the field, rhombus, star, and Pleiades.

## Cat. No. 131

Metropolitan Museum of Art, 1987.96.11

Image in MMA Online Catalogue

Stone; Neo-Assyrian, 9th–8th c.; d. 39.1 mm

Description: Two worshippers flank a deity riding atop a resting animal. The deity raises one hand and holds a scepter in the other. In the field, star, crescent, tasseled spade, and Pleiades.

## Cat. No. 132

Metropolitan Museum of Art, 1987.96.9

Image in MMA Online Catalogue

Stone; Neo-Assyrian, 9th–8th c.; d. 31 mm

Description: Worshipper with staff of Marduk, two winged and horned animals facing each other with fish set between them; star and Pleiades overhead. Hatch marks on bottom border, line border on top.

## Cat. No. 133

Metropolitan Museum of Art, 65.163.41

Marcus 1996, No. 79

Ceramic; Neo-Assyrian, 9th c.; d. 29 mm

Findspot: Hasanlu

Description: Surface is worn; tree with Pleiades in vertical alignment and animals between trees; star overhead.

## Cat. No. 134

Metropolitan Museum of Art, 74.51.4333

Image in MMA Online Catalogue

Steatite; Neo-Assyrian; d. 19.1 mm

Description: Characteristic Pleiades grouping with only six globes; star present and birdman seen. Orientation of seal uncertain, Cypriot in origin.

Cat. No. 135

Metropolitan Museum of Art, 74.51.4368

Image in MMA Online Catalogue

Faience; Neo-Assyrian; 11.9 × 20.1 mm

Description: Stamp seal; crescent moon on pillar etched with horizontal lines, star and Pleiades to each side.

Cat. No. 136

Moore Collection, L.55.49.125

Eisen 1940, No. 90

Agate; Neo-Assyrian; 28 × 10 mm

Description: Two groups: seated individual before sacred tree set atop a high support with winged creature above, fish below. Figure standing on bull facing spade of Mar-duk held by a horned lion; star and Pleiades in 2-3-2 arrangement.

Cat. No. 137

Moore Collection, L.55.49.150

Eisen 1940, No. 84

Agate; Neo-Assyrian; 25 × 12 mm

Description: God with nimbus behind him and worshipper before him, flanked by staff and spade. Scorpion-man on other side of deity. Crescent and Pleiades above.

Cat. No. 138

Moore Collection, L.55.49.189

Eisen 1940, No. 83

Chalcedony; Neo-Assyrian; 15 d. mm

Description: Two worshippers before a deity with nimbus behind him, fish symbol; winged disc, crescent moon, Pleiades in vertical arrangement above.

Cat. No. 139

Moore Collection, L.55.49.68

Eisen 1940, No. 74

Felsite; Neo-Assyrian; 50 × 18 mm

Description: Levantine seal; two archers flanking two stags, one above (rampant) and one, larger, below, flanked by plants. Row of triangles on top and bottom of seal. Pleiades, crescent, and star above.

Cat. No. 140

Moore Collection, L.55.49.85

Eisen 1940, No. 82

Lapis Lazuli; Neo-Assyrian; 40×15 mm

Description: God (Ea) holding a staff and ring, seated on throne supported by goat-fish animal. Worshipper and altar facing him; priest in fish-robe carrying a pail behind him. Above: bird winged disc, star, and Pleiades.

Cat. No. 141

Morgan Library, No. 621

Porada 1948, No. 621

Black Serpentine; Neo-Assyrian; 29.5×13 mm

Description: Standing archer taking aim at a stag, with a fish set between the two. In field, three wedges, star, crescent, and Pleiades.

Cat. No. 142

Morgan Library, No. 623

Porada 1948, No. 623

Burnt Clay; Neo-Assyrian c. 800; 25×13 mm

Description: A monster with a bull's head and scorpion body attacked from behind by an archer; a plant between figures suggesting thicket or vegetation. In field, crescent, Pleiades.

Cat. No. 143

Morgan Library, No. 627

Porada 1948, No. 627

Black Serpentine; Neo-Assyrian; 30×11.5 mm

Description: Dragon approaching or attacking ram, which flees. In field, Pleiades, crescent, three scattered wedges.

Cat. No. 144

Morgan Library, No. 635

Porada 1948, No. 635

Black Serpentine; Neo-Assyrian; 15.5×9 mm

Description: Bull charging at large rosette with Pleiades above. Lines bordering the seal on top and bottom.

Cat. No. 145

Morgan Library, No. 653

Porada 1948, No. 653

Black Serpentine; Neo-Assyrian; 37 × 16.5 mm

Description: Man plowing a field with his ox, plants emerging from the ground. In field, star, crescent, and Pleiades.

Cat. No. 146

Morgan Library, No. 660

Porada 1948, No. 660

Brown-Black Steatite; Neo-Assyrian, early 9th c.; 40 × 16 mm

Description: Horse-drawn chariot with charioteer, crescent moon and Pleiades above, standing bull underneath the horse. The scene echoes those on Aššurnāṣirpal II royal reliefs.

Cat. No. 147

Morgan Library, No. 684

Porada 1948, No. 684

Grey-Green Serpentine; Neo-Assyrian; d. 13 mm

Description: Goddess with ring and worshipper both standing and facing a god holding an ax. In field, crescent, Pleiades, stylus with star atop it.

Cat. No. 148

Morgan Library, No. 690

Porada 1948, No. 690

White Chalcedony; Neo-Assyrian, 9th–8th c.; 20 × 11 mm

Description: Lion-griffin rampant with archer attacking and striding over winged bull; another figure kneeling, holding winged sun disc. Pleiades set above.

Cat. No. 149

Morgan Library, No. 691

Porada 1948, No. 691

Carnelian; Neo-Assyrian, 9th–8th c.; 39 × 18 mm

Description: Worshipper facing deity with stylus set atop dragon; goddess with scepter on lion-monster. Pleiades and stars set above, two small deities in the nimbus of the stars.

Cat. No. 150

Morgan Library, No. 693

Porada 1948, No. 693

White Chalcedony; Neo-Assyrian, 9th–8th c.; 32.5 × 16 mm

Description: Worshipper with a bird facing deity wielding mace who rests on a raised platform. Between them stands a tasseled spade, and behind the deity a rampant

caprid. Another worshipper faces a goddess atop a platform who holds a ring. Above, Pleiades, star, and crescent.

Cat. No. 151

Morgan Library, No. 694

Porada 1948, No. 694

Pink-White Chalcedony; Neo-Assyrian, 9th–8th c.; 34 × 16 mm

Description: Goddess holding ring and scepter, seated on a high-backed throne studied with stars. Across is another deity holding axe standing atop resting animal. Between them is a worshipper, who raises his hand to figure on the right. In the field, Pleiades, winged disc, tasseled spade, and crescent.

Cat. No. 152

Morgan Library, No. 695

Porada 1948, No. 695

Brownish Chalcedony; Neo-Assyrian, 9th–8th c.; 32 × 14 mm

Description: Goddess on ring set behind deity bearing a mace, both atop platform and both facing worshipper. In field, tasseled spade, ibex, rhombus, crescent moon, star, and Pleiades.

Cat. No. 153

Morgan Library, No. 696

Porada 1948, No. 696

Greyish Chalcedony; Neo-Assyrian, 9th–8th c.; 33 × 16 mm

Description: Goddess bearing bow and sword and holding a ring stands atop platform, facing worshipper. In field, rhombus, stylus, ibex, tasseled spade, winged disc, and Pleiades.

Cat. No. 154

Morgan Library, No. 697

Porada 1948, No. 697

Ivory-Yellow Chert; Neo-Assyrian, 9th–8th c.; 32 × 15.5 mm

Description: Bull-Man, goddess armed with bows, sword; worshipper, facing a deity with rays projecting from behind him. Pleiades, crescent, and tasseled spade above.

Cat. No. 155

Morgan Library, No. 698

Porada 1948, No. 698

Ivory-Yellow Chert; Neo-Assyrian, 9th–8th c.; d. 13 mm

Description: Worshipper stands before goddess with nimbus behind her, crescent atop staff and deity in a winged sun disc. Above are the Pleiades.

Cat. No. 156

Morgan Library, No. 700

Porada 1948, No. 700

Yellow Chalcedony; Neo-Assyrian, 9th–8th c.; 39 × 18 mm

Description: Goddess with ring seated on chair ornamented with stars, facing worshipper with table or altar between them. In field, winged disc, rhombus, and Pleiades.

Cat. No. 157

Morgan Library, No. 701

Porada 1948, No. 701

Brown Chalcedony; Neo-Assyrian, 9th–8th c.; 20 × 8.5 mm

Description: Worshipper set before flaming altar at which a goddess is sitting; Pleiades above.

Cat. No. 158

Morgan Library, No. 702

Porada 1948, No. 702

Carnelian; Neo-Assyrian, 9th–8th c.; 24 × 12 mm

Description: Two rampant griffin-monsters flanking each other with worshipper between them; Pleiades, crescent moon, and star above. According to catalogue, inscription in South Arabic.

Cat. No. 159

Morgan Library, No. 703

Porada 1948, No. 703

Carnelian; Neo-Assyrian, 8th–7th c.; 17 × 10 mm

Description: God bearing ax facing a worshipper, a staff between them. Two caprids facing each other, in field, Pleiades and star.

Cat. No. 160

Morgan Library, No. 704

Porada 1948, No. 704

Orange Chert; Neo-Assyrian, 7th–6th c.; d. 13 mm

Description: Two worshippers flanking deity with nimbus, standing atop a dragon. In field, crescent, star, and Pleiades.

Cat. No. 161

Morgan Library, No. 705

Porada 1948, No. 705

Milky Chalcedony; Neo-Assyrian, 7th–6th c.; 32 × 18 mm

Description: Two worshippers flanking deity with nimbus who appears above a tree. In field, rhombus, Pleiades, and tasseled spade on a stand.

Cat. No. 162

Morgan Library, No. 707

Porada 1948, No. 707

White Chalcedony; Neo-Assyrian, 7th–6th c.; 29 × 18.5 mm

Description: Ibex and worshipper flanking tree with a winged sun disc above it. In field, star, crescent, rhombus, fish, and Pleiades.

Cat. No. 163

Morgan Library, No. 709

Porada 1948, No. 709

White Chalcedony; Neo-Assyrian, 7th–6th c.; 20 × 11 mm

Description: Tree set atop knoll; winged disc above. Worshipper faces tree with Pleiades above. In field, star, crescent, table with rhombus and fish atop it.

Cat. No. 164

Morgan Library, No. 711

Porada 1948, No. 711

White Chalcedony; Neo-Assyrian, 7th–6th c.; 30 × 13 mm

Description: Worshipper before crescent set atop stand with tassels; star and fish above and below outstretched hands. Rhombus, cross set atop globe, with winged disc above stylus and spade; Pleiades.

Cat. No. 165

Morgan Library, No. 716

Porada 1948, No. 716

Milky Chalcedony; Neo-Assyrian, 7th–6th c.; 15 × 8 mm

Description: Tree with winged sun disc above, bull approaching. In sky: star, crescent, rhombus, Pleiades.

Cat. No. 166

Morgan Library, No. 718

Porada 1948, No. 718

Unidentified stone; Neo-Assyrian, 7th–6th c.; 15 × 10 mm

Description: Tree, possibly, table with single star and uncertain Pleiades above.



Cat. No. 167

Morgan Library, No. 725

Porada 1948, No. 725

Milky Chalcedony; Late Middle/Early Neo-Assyrian, 10th–8th c.; 35 × 16 mm

Description: Archer attacking griffin with crescent, star, and winged sun disc; rhombus and two pairs of wedges in field. Pleiades set above in an arc.

Cat. No. 168

Morgan Library, No. 726

Porada 1948, No. 726

Brown Chert; Neo-Assyrian, 10th–8th c.; 47 × 17 mm

Description: God and worshipper grasping respective streams falling from winged disc set atop a tree. In field, Pleiades (above the worshipper), star, crescent, two unreadable cuneiform signs.

Cat. No. 169

Morgan Library, No. 731

Porada 1948, No. 731

Milky Chalcedony; Neo-Assyrian, 10th–8th c.; 41 × 17 mm

Description: Kneeling worshipper with hand reaching towards tree, crescent moon, star, fish in field. Pleiades above in atypical 2 + 5 configuration.

Cat. No. 170

Morgan Library, No. 733

Porada 1948, No. 733

White-Brownish Chalcedony; Neo-Assyrian, 10th–7th c.; 26 × 10 mm

Description: Two bird-men facing each other, rhombus between them. Pleiades and crescent moon above.

Cat. No. 171

Morgan Library, No. 750

Porada 1948, No. 750

Dark Grey Chert; Neo-Assyrian, 7th c.; 24 × 9 mm

Description: Winged hero with sword attacking griffin, rhombus set immediately before griffin. In field, crescent, Pleiades, and sitting dog.

Cat. No. 172

Morgan Library, No. 751

Porada 1948, No. 751

Reddish Marble with prominent grey vein; Neo-Assyrian, 7th; 27 × 12 mm

Description: Genie figure on one knee, raising hand towards winged disc, facing stag that is grasped by a warrior wielding a sword. Above, crescent and Pleiades.

Cat. No. 173

Morgan Library, No. 771

Porada 1948, No. 771

Black-Grey Chalcedony; Neo-Assyrian, late 8th c.; 27 × 15 mm

Description: Genie flanking date palm; tree with deity; winged disc with kneeling figures flanking and bull-men. Crescent moon, star, and Pleiades above.

Cat. No. 174

Morgan Library, No. 774

Porada 1948, No. 774

White Chalcedony; Neo-Assyrian, late 8th c.; 34 × 16 mm

Description: Goddess with ring before tree with winged disc atop it. On other side of tree, deity wielding ax followed by worshipper with four stars adorning robe. In field, fish, crescent, Pleiades.

Cat. No. 175

Morgan Library, No. 964

Porada 1948, No. 964

Hematite; 1600–1350 BC; 23 × 11 mm

Description: Syrian seal, deity with spiked helmet, wielding mace and holding ax. Bull and worshipper, solar disc, crescent, star, Pleiades.

Cat. No. 176

Morgan Library, No. 990

Porada 1948, No. 990

Hematite; 1600–1350 BCE; 27 × 14 mm

Description: Late Syrian seal, worshipper before deity holding two snakes. Egyptian ankh, sun disc, crescent, Pleiades. Nude female embracing figure.

Cat. No. 177

Morgan Library, No. 1027

Porada 1948, No. 1027

Hematite; 1350–1200 BCE; 10.5 × 9 mm

Description: Syrian seal, enthroned goddess facing worshipper; seven dots in loose rosette shape, uncertain Pleiades.

Cat. No. 178

Morgan Library, No. 1028

Porada 1948, No. 1028

Hematite; 1350–1200 BCE; 25 × 12 mm

Description: Mitanni-style seal with seven dots in a loose rosette (uncertain Pleiades).

Seated goddess holding staff, adorned with rosette.

Cat. No. 179

Morgan Library, No. 1048

Porada 1948, No. 1048

Dark Green Jasper; 1350–1200 BCE; 20 × 11 mm

Description: Seal with Mitanni and Nuzi stylistic elements, nine globes in loose Pleiades arrangement; sun-disc standard set between griffin and antelope-like animal with wings.

Cat. No. 180

Morgan Library, No. 1058

Porada 1948, No. 1058

Brown Hematite; 1350–1200 BCE; 20 × 10 mm

Description: Nuzi style seal; winged bird-headed demon, fish flanking it. Winged disc and Pleiades above lion.

Cat. No. 181

Morgan Library, No. 1094

Porada 1948, No. 1094

Dark Green Steatite; 2000–1800 BCE; 25 × 13 mm

Description: Potentially uncertain authenticity. Worshipper bearing cup facing figure drinking from vessel. Pleiades, crescent, and single star above.

Cat. No. 182

Newell Collection, 409

von der Osten 1934, No. 409

Red Marble; Neo-Assyrian; 23 × 11 mm

Description: Unicorn-figure and man; crescent and Pleiades above. Seal very worn.

Cat. No. 183

Newell Collection, 413

von der Osten 1934, No. 413

Steatite; Neo-Assyrian; 19 × 12 mm

Description: Worshipper, crescent moon and Pleiades overhead. Seal very worn.

Cat. No. 184

Newell Collection, 415

von der Osten 1934, No. 415

Serpentine; Neo-Assyrian; 18 × 9 mm

Description: Walking horned animal; crescent moon, star, Pleiades above.

Cat. No. 185

Newell Collection, 446

von der Osten 1934, No. 446

Chalcedony; Neo-Assyrian; 28 × 12 mm

Description: Deity with cylindrical headdress, six-pointed star; crescent moon, rosette, winged disc, and Pleiades overhead. Two sitting ibexes facing each other in lower left.

Cat. No. 186

Newell Collection, 447

von der Osten 1934, No. 447

Diorite; Neo-Assyrian; 23 × 13 mm

Description: Bearded god with man facing him; star, crescent, and Pleiades above. Seal worn.

Cat. No. 187

Newell Collection, 504

von der Osten 1934, No. 504

Hematite; Neo-Babylonian; 22 × 11 × 16 mm

Description: Stamp seal, tree with crescent and Pleiades above.

Cat. No. 188

Newell Collection, 520

von der Osten 1934, No. 520

Milky Chalcedony; Neo-Babylonian; 19 × 4 × 23 mm

Description: Stamp seal, staff with seven globes.

Cat. No. 189

Pontifical Biblical, IB. SA 89

van Buren 1940, No. 66

Pale Rose Quartz; Neo-Assyrian (?); 21 × 11 mm

Description: Ibex flees from archer, with crescent before and eight-pointed star and Pleiades behind. Archer in chariot pursuing animal, taking aim.

Cat. No. 190

Pontifical Biblical, IB. SA 106

van Buren 1940, No. 75

Bituminous Limestone; Neo-Assyrian (?); 32×14 mm

Description: Worn seal. Bearded deity stands to the right, left hand grasps foreleg of winged monster, right hand worn away. Winged disc atop spade of Marduk, Pleiades above monsters.

Cat. No. 191

Pontifical Biblical, IB. SA 108

van Buren 1940, No. 103

Milky Chalcedony; Neo-Assyrian (?); 29×15 mm

Description: Deity (Marduk) enthroned, hound or lion seated before him. Worshipper and figure in lion-robe flank spade, staff, and winged disc. In field, 3 stars and Pleiades.

Cat. No. 192

Legrain 1925, No. 610

University of Pennsylvania, CBS 1051

Chalcedony; Neo-Assyrian; 27.5×15 mm

Description: Marduk pursuing and shooting at a winged griffin-creature. He is armed with two quivers, an axe (possibly sword?) in his belt, and his belt is lined with six stars. To the far left, a worshipper stands. In field, crescent, star, rhombus, and Pleiades.

Cat. No. 193

University of Pennsylvania, CBS 1052

Legrain 1925, No. 580

Black Diorite; Neo-Assyrian; 26.5×12 mm

Description: Ištar with nimbus of rays behind her, with one hand lifted. She bears a quiver and bow. Across from her stands a worshipper, and between them a tall altar burning incense or charcoal. In field, spade of Marduk, Pleiades.

Cat. No. 194

University of Pennsylvania, CBS 1096

Legrain 1925, No. 602

Serpentine; Neo-Assyrian; 16.5×7 mm

Description: Palm tree and a lion seizing a caprid. In the field, sun disc, eight-pointed star, and Pleiades.

Cat. No. 195

Vorderasiatisches Museum, 596

Moortgart 1940, No. 596

Chalcedony; Neo-Assyrian; 51 mm

Description: God with raised hand atop bull, worshipper before and another deity holding a ring at his back. In field, crescent, tasseled spade, stylus, lozenge, winged disc with deity inside, staff, rampant ibex, and bird.

Inscription: (Seal) of Adad-ušur, the "great" of Mannukima-Aššur

Cat. No. 196

Vorderasiatisches Museum, VA 508

Moortgart 1940, No. 598

Chalcedony; Neo-Assyrian; 37 × 17 mm

Description: God facing worshipper. Deity holds a ring with a nimbus behind him. Scorpion man and *mušhuššu* with stylus and spade atop its back. In field, winged disc, star, crescent, the Pleiades, lozenge, and fish.

Inscription: Seal of Nisannā'a

Cat. No. 197

Vorderasiatisches Museum, VA 10114

Moortgart 1940, No. 10114

Chalcedony; Neo-Assyrian; 33 × 16 mm

Description: Deity with nimbus behind him, flanked by worshipper and scorpion man with a winged disc above. In field, reclining caprid, tasseled spade, staff, lozenge, crescent, and the Pleiades.

Inscription: (Seal) of Kabili

Cat. No. 198

Vorderasiatisches Museum, VA 4220

Moortgart 1940, No. 605

Chalcedony; Neo-Assyrian; 29 × 12 mm

Description: Seated deity holding ring; chair adorned with globes. Before deity, standing deity with nimbus behind and worshipper facing. In field, tasseled spade, crescent, and Pleiades.

Cat. No. 199

Vorderasiatisches Museum, VA 7826

Moortgart 1940, No. 606

Chalcedony; Neo-Assyrian; 48 × 19 mm

Description: Two griffins flanking sacred tree with winged disc above and figure to the right. Above, crescent and Pleiades.

Cat. No. 200

Vorderasiatisches Museum, VA 4244

Moortgart 1940, No. 640

Marble; Neo-Assyrian; 32 × 12 mm

Description: Archer attacking winged horse; scattered wedges and plant to suggest landscape. In field, crescent, star, Pleiades.

Cat. No. 201

Vorderasiatisches Museum, VA Ass 1686

Moortgart 1940, No. 649

Black, shiny stone; Neo-Assyrian; 21 × 11 mm

Description: Row of rampant horses; star, crescent moon, Pleiades in 2-3-2 arrangement.

Cat. No. 202

Vorderasiatisches Museum, VA 5191

Moortgart 1940, No. 654

Serpentine; Neo-Assyrian; 28 × 13 mm

Description: Seated deity with worshipper facing, an altar set between them. In field, bird, crescent, star, and Pleiades.

Cat. No. 203

Vorderasiatisches Museum, 655

Moortgart 1940, No. 655

Porphyry; Neo-Assyrian; 34 × 13 mm

Description: From Aššur. God seated on high-backed throne ornamented with stars and atop a lion. Worshipper facing deity, with high incense burner between them. In field, spade, stylus, crescent, star, and Pleiades.

Cat. No. 204

Vorderasiatisches Museum, VA Ass 1689

Moortgart 1940, No. 659

Limestone; Neo-Assyrian; 22 × 13 mm

Findspot: Aššur (No. 5348)

Description: Seal quite worn. Worshipper approaches deity seated on high-backed throne ornamented by star. Between them, Pleiades, winged disc, and altar.

Cat. No. 205

Vorderasiatisches Museum, VA 7865

Moortgart 1940, No. 672

Serpentine; Neo-Assyrian; 45 × 16 mm

Findspot: Aššur (No. 9186)

Description: Three men holding offerings with possible altar between rightmost two and leftmost third. In field, star, crescent, Pleiades, and multiple wedges.

Cat. No. 206

Vorderasiatisches Museum, VA 127

Moortgart 1940, No. 682

Serpentine; Neo-Assyrian; 36 × 16 mm

Description: Man holding the head of a cow suckling two calves while being mounted by a bull. In field, star, crescent, and Pleiades.

Cat. No. 207

Vorderasiatisches Museum, VA 4996

Moortgart 1940, No. 710

Blue Frit; Neo-Assyrian; 27 × 10 mm

Description: Two griffins facing each other with crescent and Pleiades above.

Cat. No. 208

Walters Art Museum, 42.668

Walter's Art Museum online catalogue

Chalcedony; Neo-Assyrian; d. 15 mm

Description: Two sets of worshippers and deities; the two worshippers are set back-to-back and each facing their respective deity that holds a ring or scepter. In the field, winged disc, star, Pleiades, crescent, spade, stylus, and small offering table.

Cat. No. 209

Walters Art Museum, 42.686

Walter's Art Museum online catalogue

Chalcedony; Neo-Assyrian; d. 11 mm

Description: Worshipper before two deities, each atop a dais. Far left deity hold a ring, the other a scepter. Each is surrounded by a nimbus. In the field, tasseled spade, crescent, Pleiades.

Cat. No. 210

Walters Art Museum, 42.705

Walter's Art Museum online catalogue

Chalcedony; Neo-Assyrian; d. 13 mm

Description: Worshipper before deity with nimbus behind him. Behind worshipper, staff and spade on platform, with scorpion-man with raised arms behind it. In field, rhombus, star, crescent, winged disc (obscured by damage), and Pleiades.



Cat. No. 211

Walters Art Museum, 42.792

Walter's Art Museum online catalogue

Chalcedony; Neo-Assyrian

Description: Deity seated on a throne resting on the back of a dog. Worshipper holding a bird approaches, another deity standing atop a dog behind him. In field, Pleiades, crescent, star, and tasseled spade.
